# Supplementary material for: Human Infection with Influenza A(H7N9) Virus during 3 Major Epidemic Waves, China, 2013–2015
Source: PubMed Central journal article supplement (PMC4880089; doi:10.3201/eid2206.151752), 2016-06
Supplement: 15-1752-Techapp-s1.pdf [file 15-1752-Techapp-s1.pdf]

# Human Infection with Influenza A(H7N9) Virus during 3 Major Epidemic Waves, China, 2013–2015

## Technical Appendix

Technical Appendix Table. Influenza A(H7N9) cases, deaths, intensive-care-unit admissions, and those on mechanical ventilation reported during epidemic waves in mainland China, 2013-2015

| Characteristic                | No. (%) by epidemic wave |             |            |            |
|-------------------------------|--------------------------|-------------|------------|------------|
|                               | 1A, N = 19               | 1B, N = 115 | 2, N = 306 | 3, N = 215 |
| Deaths                        | 12 (63)                  | 33 (29)     | 129 (42)   | 100 (47)   |
| Intensive-care-unit admission | 15 (79)                  | 71 (62)     | 106 (35)   | 104 (48)   |
| Mechanical ventilation        | 14 (74)                  | 57 (50)     | 92 (30)    | 90 (42)    |
| Mild case*                    | 1 (5)                    | 9 (8)       | 33 (11)    | 27 (13)    |

\*Patients were admitted to hospitals not due to medical reasons.

## Definition of Residence Used in the Study

China has a hierarchical administrative system from the top of central government down to provincial, city, county, and town/township governments. Provincial capital cities and municipalities were generally the largest urban areas in the country because of the large population size and stronger economy competency. Other cities in a province are relatively smaller urban areas in terms of population and economy compared with the provincial capital, whereas counties and towns/townships largely consist of rural areas, except for a small urban area where the local government usually is located in each county/town/township. Given the potential difference in exposure to live poultry in “bigger” (provincial capital cities or municipalities) and “smaller” (other medium- or small-size cities) cities, and rural areas (counties/towns/townships excluding urban areas), we therefore divided all places where each patient reported living into 3 categories: 1) provincial capital cities or municipalities, 2). other cities, 3) rural areas, as shown in Tables 1 and 2.
